# Supplementary material for: The Plasticity and Developmental Potential of Termites
Source: Frontiers journal article supplement (doi:10.3389/fevo.2021.552624), 2021-02-18
Supplement: Table_3.DOCX [file Table_3.DOCX]

1. Watson L, Abbey M. 1977 The development of reproductives. *Development* , 161–164. (doi:10.1111/j.1440-6055.1977.tb00080.x)

2. Noirot C. 1985 The caste system in higher termites. In *Caste differentiation in social insects*, pp. 75–86. Elsevier. (doi:10.1016/B978-0-08-030783-1.50011-2)

3. Roisin Y. 2000 Diversity and Evolution of Caste Patterns. In *Termites: Evolution, Sociality, Symbioses, Ecology*, pp. 95–119. Dordrecht: Springer Netherlands. (doi:10.1007/978-94-017-3223-9_5)

4. Mednikova TK. 1977 Caste differentiation in the termite Anacanthotermes ahngerianus Jacobson (Isoptera, Hodotermitidae). *Proc. Int. Congr. Int. Union Study Soc. Insects*

5. Watson J. 1973 The Worker Caste of the Hodotermitid Harvester Termites. *Insectes Soc.* **20**, 1–20.

6. Johnson SE, Breisch NL, Momen B, Thorne BL. 2011 Morphology and gonad development of normal soldiers and reproductive soldiers of the termite Zootermopsis nevadensis nevadensis (Isoptera, Archotermopsidae). *Zookeys* **148**, 15–30. (doi:10.3897/zookeys.148.1672)

7. Heath H. 1927 Caste formation in the termite genus termopsis. *J. Morphol.* **43**, 387–425. (doi:10.1002/jmor.1050430206)

8. Miura T, Hirono Y, Machida M, Kitade O, Matsumoto T. 2000 Caste developmental system of the Japanese damp-wood termite Hodotermopsis japonica (Isoptera: Termopsidae). *Ecol. Res.* **15**, 83–92. (doi:10.1046/j.1440-1703.2000.00320.x)

9. Koshikawa S, Matsumoto T, Miura T. 2004 Soldier-like Intercastes in the Rotten-wood Termite Hodotermopsis sjostedti (Isoptera: Termopsidae). *Zoolog. Sci.* **21**, 583–588. (doi:10.2108/zsj.21.583)

10. Miura T, Koshikawa S, Machida M, Matsumoto T. 2004 Comparative studies on alate wing formation in two related species of rotten-wood termites: Hodotermopsis sjostedti and Zootermopsis nevadensis (Isoptera, Termopsidae). *Insectes Soc.* **51**, 247–252. (doi:10.1007/s00040-003-0736-2)

11. Korb J, Katrantzis S. 2004 Influence of environmental conditions on the expression of the sexual dispersal phenotype in a lower termite: Implications for the evolution of workers in termites. *Evol. Dev.* **6**, 342–352. (doi:10.1111/j.1525-142X.2004.04042.x)

12. Korb J, Weil T, Hoffmann K, Foster KR, Rehli M. 2009 A gene necessary for reproductive suppression in termites. *Science (80-. ).* **324**, 758. (doi:10.1126/science.1170660)

13. Muller H, Korb J. 2008 Male or female soldiers? An evaluation of several factors which may influence soldier sex ratio in lower termites. *Insectes Soc.* **55**, 213–219. (doi:10.1007/s00040-008-0996-3)

14. Sewell JJ, Watson JAL. 1981 *Developmental pathways in Australian species of Kalotermes Hagen (Isoptera)*. See http://agris.fao.org/agris-search/search.do?recordID=US19830854336.

15. Korb J, Schneider K. 2007 Does kin structure explain the occurrence of workers in a lower termite? *Evol. Ecol.* **21**, 817–828. (doi:10.1007/s10682-006-9153-5)

16. Neoh K-B, Lee C-Y. 2011 Developmental Stages and Caste Composition of a Mature and Incipient Colony of the Drywood Termite, Cryptotermes dudleyi (Isoptera: Kalotermitidae). *J. Econ. Entomol.* **104**, 622–628. (doi:10.1603/ec10346)

17. Roisin Y, Pasteels JM. 1991 Polymorphism in the giant cocoa termite, Neotermes papua (Desneux). *Insectes Soc.* **38**, 263–272. (doi:10.1007/BF01314912)

18. Roisin Y, Pasteels JM. 1991 Sex ratio and asymmetry between the sexes in the production of replacement reproductives in the termite, *Neotermes papua* (Desneux). *Ethol. Ecol. Evol.* **3**, 327–335. (doi:10.1080/08927014.1991.9525361)

19. Roisin Y. 1988 Morphology, development and evolutionary significance of the working stages in the caste system of Prorhinotermes (Insecta, Isoptera). *Zoomorphology* **107**, 339–347. (doi:10.1007/BF00312217)

20. Parmentier D, Roisin Y. 2003 Caste morphology and development in Termitogeton nr. planus (Insecta, Isoptera, Rhinotermitidae). *J. Morphol.* **255**, 69–79. (doi:10.1002/jmor.10047)

21. Bourguignon T, Šobotník J, Sillam-Dussès D, Jiroš P, Hanus R, Roisin Y, Miura T. 2012 Developmental Pathways of Psammotermes hybostoma (Isoptera: Rhinotermitidae): Old Pseudergates Make up a New Sterile Caste. *PLoS One* **7**, 9–13. (doi:10.1371/journal.pone.0044527)

22. Bourguignon T, Šobotník J, Hanus R, Roisin Y. 2009 Developmental pathways of Glossotermes oculatus (Isoptera, Serritermitidae): At the cross-roads of worker caste evolution in termites. *Evol. Dev.* **11**, 659–668. (doi:10.1111/j.1525-142X.2009.00373.x)

23. Barbosa JRC, Constantino R. 2017 Polymorphism in the neotropical termite Serritermes serrifer. *Entomol. Exp. Appl.* **163**, 43–50. (doi:10.1111/eea.12532)

24. Roisin Y, Lenz M. 1999 Caste developmental pathways in colonies of Coptotermes lacteus (Froggatt) headed by primary reproductives (Isoptera, Rhinotermitidae). *Insectes Soc.* **46**, 273–280. (doi:10.1007/s000400050146)

25. Lenz M, Runko S. 1993 Long-term impact of orphaning on field colonies of Coptotermes lacteus (Froggatt) (Isoptera: Rhinotermitidae). *Insectes Soc.* **40**, 439–456. (doi:10.1007/BF01253906)

26. Vieau F. 1991 Le termite de Saintonge: Un danger pour l ‘Ouest de la France. *Penn Bed 140.1932* , 60.

27. Vieau F. 1994 Les stades nymphaux 7 et 8 chez Reticulitermes santonensis Feytaud (Isoptera, Rhinotermitidae). *Actes Colloq Insectes Soc.* **9**, 61–66.

28. Lainé LV, Wright DJ. 2003 The life cycle of Reticulitermes spp. (Isoptera: Rhinotermitidae): what do we know? *Bull. Entomol. Res.* **93**. (doi:10.1079/ber2003238)

29. Neoh KB, Lee CY. 2009 Developmental stages and castes of two sympatric subterranean termites Macrotermes gilvus and Macrotermes carbonarius (Blattodea: Termitidae). *Ann. Entomol. Soc. Am.* **102**, 1091–1098. (doi:10.1603/008.102.0617)

30. Neoh KB, Lenz M, Lee CY. 2010 Impact of orphaning on field colonies of Southeast Asian Macrotermes gilvus (Hagen) and M. carbonarius (Hagen) (Termitidae, Macrotermitinae). *Insectes Soc.* **57**, 431–439. (doi:10.1007/s00040-010-0101-6)

31. Okot-Kotber BM. 1981 Instars and polymorphism of castes in Macrotermes michaelseni (Isoptera, Macrotermitinae). *Insectes Soc.* **28**, 233–246. (doi:10.1007/BF02223626)

32. Thorne BL, Noirot C. 1982 Ergatoid reproductives in Nasutitermes corniger (Motschulsky) (Isoptera: Termitidae). *Int. J. Insect Morphol. Embryol.* **11**. (doi:10.1016/S0020-7322(82)80006-8)

33. Roisin Y. 1990 Queen replacement in the termite Microcerotermes papuanus. *Entomol. Exp. Appl.* **1**, 83–90.

34. Noirot C. 1955 Recherches sur le polymophisme des termites superieurs (Termitidae). *Ann. des Sci. Nat. Ser. 11, Zool. Biol. Anim.* **17**, 399–595.

35. Rasib KZ, Akhtar MS. 2012 Caste Developmental Pathways in Populations of Microcerotermes championi (Isoptera: Termitidae, Microcerotermitinae). *Int. J. Agric. Biol.* **14**, 161–168.

36. McMahan EA, Watson JAL. 1975 Non-reproductive castes and their development in Nasutitermes exitiosus (Hill) (Isoptera). *Insectes Soc.* **22**, 183–197. (doi:10.1007/BF02223428)

37. Watson JAL, Abbey HM. 1987 Maternal determination of reproductive vs sterile castes in Nasutitermes exitiosus (Hill) (Isoptera: Termitidae). *Insectes Soc.* **34**, 291–297. (doi:10.1007/BF02224361)

38. Roisin Y. 1992 Development of non-reproductive castes in the neotropical termite genera Cornitermes, Embiratermes and Rhynchotermes (Isoptera, Nasutitermitinae). *Insectes Soc.* **39**, 313–324. (doi:10.1007/BF01323951)

39. Barbosa JRC, Moura FM da S, Bandeira AG, Vasconcellos A. 2012 Caste Differentiation Pathways in the Neotropical Termite Armitermes holmgreni (Isoptera: Termitidae) . *Zoolog. Sci.* **29**, 738–742. (doi:10.2108/zsj.29.738)

40. Roisin Y, Pasteels JM. 1987 Caste developmental potentialities in the termite Nasutitermes novarumhebridarum. *Entomol. Exp. Appl.* **44**, 277–287. (doi:10.1111/j.1570-7458.1987.tb00556.x)

41. Noirot C. 1969 Formation of Castes in the Higher Termites. *Biol. Termit.* , 311–350. (doi:10.1016/B978-0-12-395529-6.50014-3)

42. Haifig I, Leonardo FC, Costa FF, Costa-Leonardo AM. 2012 On the Apterous Line of the Termite Velocitermes heteropterus (Isoptera: Termitidae): Developmental Pathways and Cellulose Digestion . *Zoolog. Sci.* **29**, 815–820. (doi:10.2108/zsj.29.815)

43. Haifig I, Costa-Leonardo AM. 2016 Caste differentiation pathways in the Neotropical termite Silvestritermes euamignathus (Isoptera: Termitidae). *Entomol. Sci.* **19**, 174–179. (doi:10.1111/ens.12201)

44. Moura FMS, Vasconcellos A, Silva NB, Bandeira AG. 2011 Caste development systems of the Neotropical termite Constrictotermes cyphergaster (Isoptera, Termitidae). *Insectes Soc.* **58**, 169–175. (doi:10.1007/s00040-010-0132-z)

45. Cunha HF da, Brandão D. 2002 Multiple reproductives in nests of the Neotropical termite Constrictotermes cyphergaster (Isoptera, Termitidae, Nasutitermitinae). *Rev. Bras. Entomol.* **46**, 21–24. (doi:10.1590/s0085-56262002000100004)

46. Miura T, Roisin Y, Matsumoto T. 1998 Developmental Pathways and Polyethism of Neuter Castes in the Processional Nasute Termite Hospitalitermes medioflavus (Isoptera: Termitidae). *Zoolog. Sci.* **15**, 843–848. (doi:10.2108/zsj.15.843)

47. Giovana Mariela Annoni , Juan Manuel Coronel ERL. 2017 CASTE DEVELOPMENTAL PATHWAYS OF Cortaritermes fulviceps (BLATTODEA, TERMITIDAE). *Brazilian J. Agric.* **92**, 1–11. (doi:10.1177/0333102415593087)

48. Bourguignon T, Šobotník J, Dahlsjö CAL, Roisin Y. 2016 The soldierless Apicotermitinae: insights into a poorly known and ecologically dominant tropical taxon. *Insectes Soc.* **63**, 39–50. (doi:10.1007/s00040-015-0446-y)

49. Kaiser P. 1956 Die Hormonalorgane der Termiten im Zusammenhang mit der Entstehung ihrer Kasten. *Mitteilungen aus dem Hambg. Zool. Museum und Inst.* **54**, 129–178.

50. Chouvenc T, Su N-Y. 2014 Colony age-dependent pathway in caste development of Coptotermes formosanus Shiraki. *Insectes Soc.* **61**, 171–182. (doi:10.1007/s00040-014-0343-9)

51. Costa-Leonardo AM, Arab A, Casarin FE. 2004 Neotenic formation in laboratory colonies of the termite Coptotermes gestroi after orphaning. *J. Insect Sci.* **4**. (doi:10.1093/jis/4.1.10)

52. Myles TG. 1999 Review of secondary reproduction in termites (Insecta: Isoptera) with comments on its role in termite ecology and social evolution. *Sociobiology* **33**, 1–43.

53. Grassé P, Noirot C. 1951 Migration et fragmentation de la termitière chez les Anoplotermes et les Trinervitermes. *Behaviour* **3**, 146–166.

54. Snyder TE. 1949 *Catalog of the Termites (Isoptera) of the World.* See https://www.cabdirect.org/cabdirect/abstract/20057006927.

55. Weyer F. 1930 Uber Ersatzgeschlechtstiere Bei Termiten. *Zoomorphology* **1**, 364–380.

56. Thorne BL. 1985 Termite polygyny: The ecological dynamics of queen mutualism.

57. da Silva IB, Haifig I, Vargo EL, Casarin FE, da Mota ML, Lima JT, Costa‐Leonardo AM. 2019 Ergatoid reproductives in the Neotropical termite Nasutitermes aquilinus (Holmgren) (Blattaria: Isoptera: Termitidae): developmental origin, fecundity, and genetics . *Insect Sci.* (doi:10.1111/1744-7917.12727)

58. Fontes L., Terra P. 1981 A study on the taxonomy and biology the neotropical termite Nasutitermes aquilinus (Isoptera, Termitidae, Nasutitermitinae) [Termite; Animal taxonomy; Biology; Pest of plant]. *Rev. Bras. Entomol.*

59. JLN L. 1980 Recherches sur le polymorphisme et apergu sur l’influence de l’hormone juvénile sur le développement d’un termite, Hodotermes mossambicus (Isoptera, Hodotermitidae). *Biol Ecol Medt* **7**, 169–171.

60. Lüscher M. 1952 individuelle Wachstum flavicollis Fabr. Kastenbildungsproblem). *Biol. Zent. Bl.* **71**, 529–543.

61. El-Sherif, S. L, H. KA. 1974 Survey and taxonomy of the termites of Egypt. *Bull. la Société Entomol. d’Égypte* , 283–297.

62. Roy-Noel J (1974). 1974 Contribution à la connaissance des reproducteurs de remplacement chez les termites supérieurs: observations sur Bellicositermes natalensis (Macrotermitinae). *Comptes rendus Hebd. des seances. Ser. D. Sci. Nat.*

63. Silvestri F. 1914 Contribuzione alla conoscneza dei termitidi e termitofili dell’Africa occidentale I. Termitidi. *Boll. Lab. Zool. Gen. Agr. R. Scuol. Sup. Agr. Portici* **9**, 1–146.

64. Light SF, Weesner FM. 1948 Biology of Arizona termites with emphasis on swarming. *Pan-Pacific Entomol*

65. Weesner F. 1953 The Biology of Tenuirostritermes Tenuirostris (Desneux) with Emphasis on Caste Development. *Univ. Calif. Press*
